# Supplementary material
Source: PubMed Central journal article supplement (PMC7305891)
Supplement: mmc1.pdf [file mmc1.pdf]

**(A)**

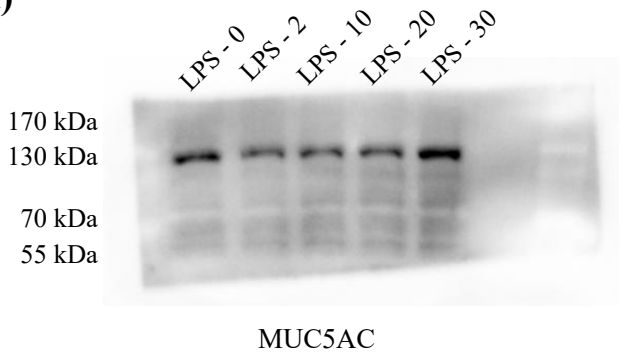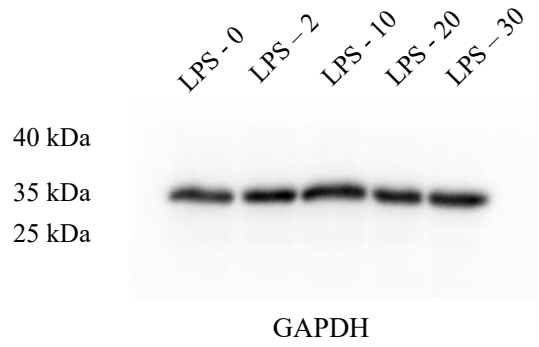

**(B)**

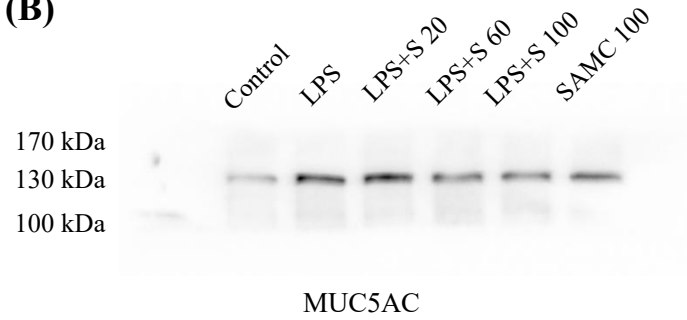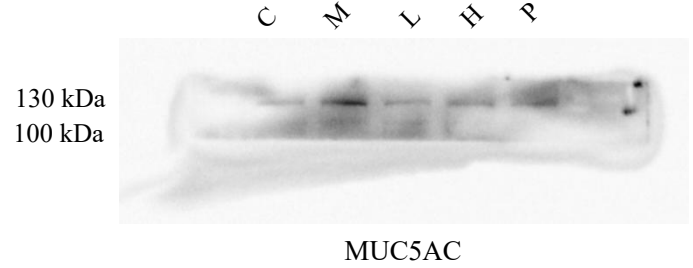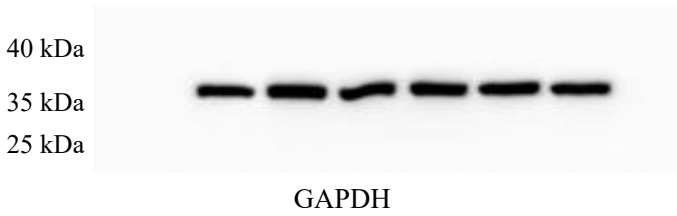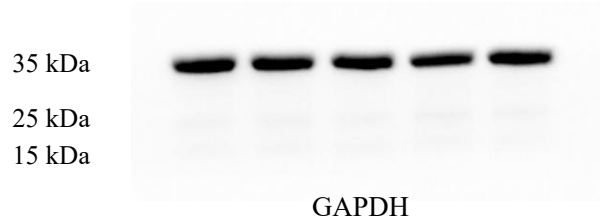

Supplementary Fig. 1. (A) and (B): Corresponding uncropped images of western blots shown in Fig. 2A and 2B, respectively.

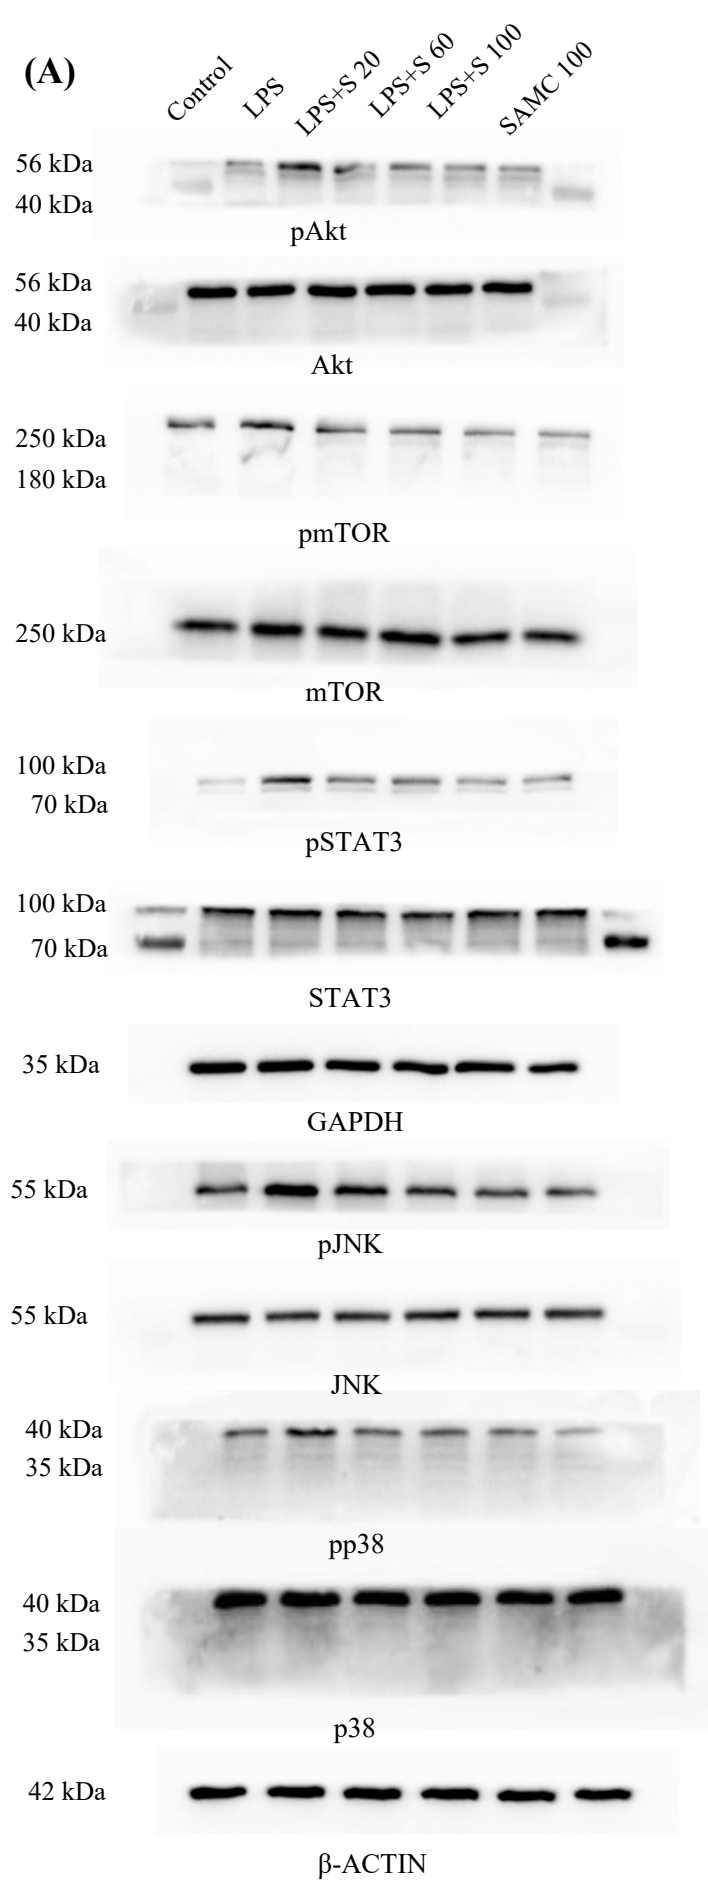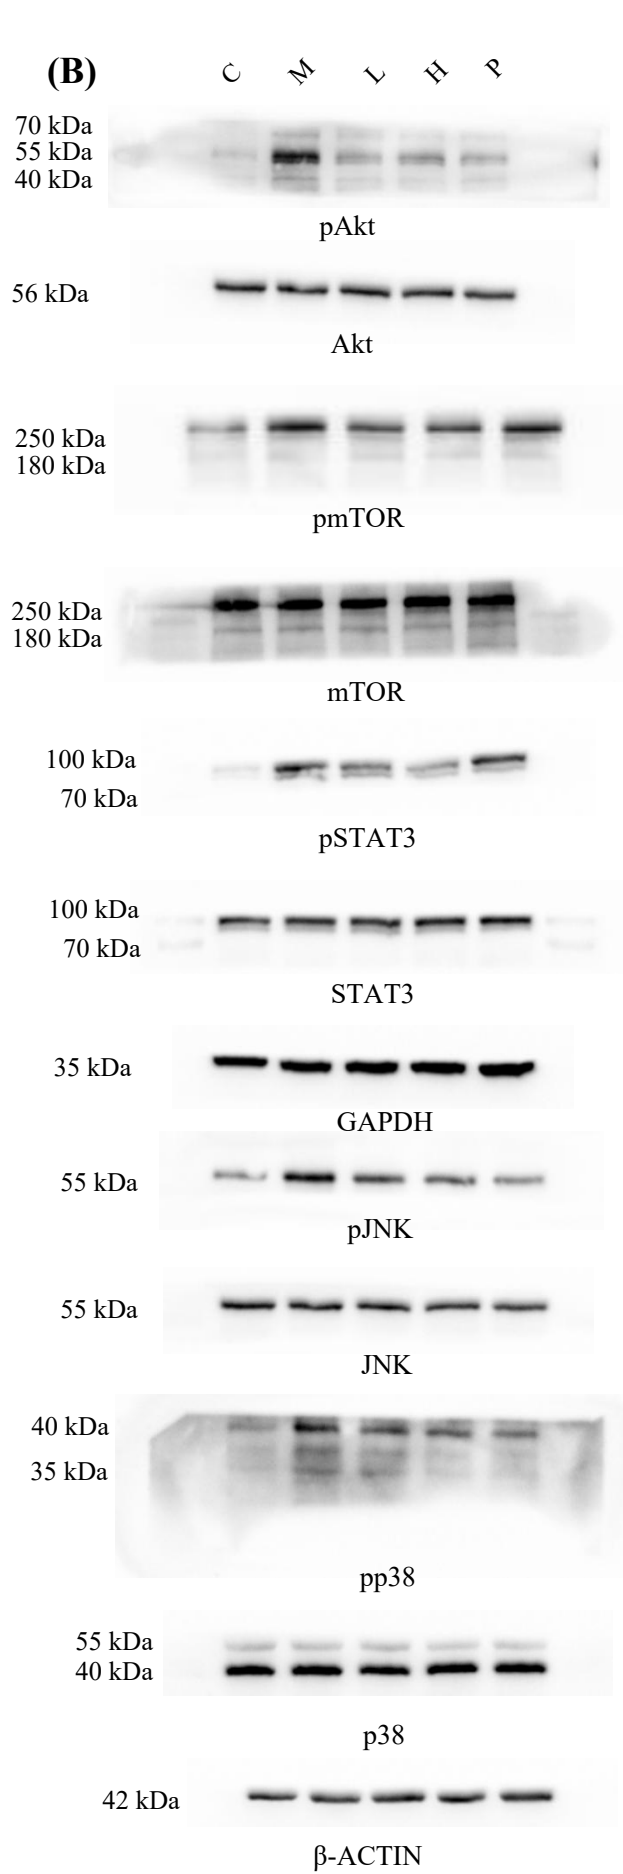

Supplementary Fig. 2. (A) and (B): Corresponding uncropped images of western blots shown in Fig. 6B and 6D, respectively.
